# Supplementary material for: Comparative Analysis of the Evolution of Green Leaf Volatiles and Aroma in Six Vitis vinifera L. Cultivars during Berry Maturation in the Chinese Loess Plateau Region
Source: MDPI journal article supplement (doi:10.3390/foods13081207), 2024-04-16
Supplement: s1 [file s1]

Table S1. Temperature and rainfall conditions during vintages 2019 and 2020.

|                               | April | May   | June  | July  | August | September |
|-------------------------------|-------|-------|-------|-------|--------|-----------|
| Vintage 2019                  |       |       |       |       |        |           |
| Mean maximum temperature (°C) | 23.20 | 28.60 | 33.50 | 35.00 | 31.40  | 27.70     |
| Mean minimum temperature (°C) | 10.99 | 15.62 | 21.62 | 23.73 | 21.99  | 17.14     |
| Mean temperature (°C)         | 16.35 | 21.88 | 27.08 | 28.85 | 26.16  | 21.55     |
| Mean relative humidity        | 49.50 | 32.40 | 37.80 | 44.50 | 54.10  | 52.40     |
| Sum rainfall (mm)             | 40.60 | 3.20  | 75.20 | 35.00 | 66.30  | 111.90    |
| Mean sunshine hours (h)       | 8.53  | 8.81  | 9.07  | 9.68  | 9.72   | 9.12      |
| Vintage 2020                  |       |       |       |       |        |           |
| Mean maximum temperature (°C) | 22.74 | 29.66 | 32.26 | 31.92 | 30.45  | 27.42     |
| Mean minimum temperature (°C) | 8.55  | 15.99 | 20.75 | 21.88 | 22.10  | 16.80     |
| Mean temperature (°C)         | 15.37 | 22.61 | 26.01 | 26.38 | 25.48  | 21.52     |
| Mean relative humidity        | 39.04 | 40.64 | 47.68 | 58.20 | 68.39  | 56.38     |
| Sum rainfall (mm)             | 30.80 | 62.70 | 55.40 | 77.70 | 183.70 | 10.80     |
| Mean sunshine hours (h)       | 10.39 | 10.24 | 10.27 | 10.57 | 11.07  | 10.13     |

Table S2. Physicochemical parameters in the berries of six *Vitis vinifera* L. cultivars at harvest.

| Vintages | Varieties          | TSS (Brix) <sup>a</sup> | TA (g L <sup>-1</sup> ) <sup>b</sup> | pH          |
|----------|--------------------|-------------------------|--------------------------------------|-------------|
| 2019     | Chardonnay         | 19.29±0.11 d            | 5.84±0.05 a                          | 4.16±0.01 c |
|          | Sauvignon Blanc    | 19.94±0.36 c            | 5.47±0.14 b                          | 4.29±0.02 a |
|          | Cabernet Sauvignon | 22.90±0.10 b            | 5.23±0.02 c                          | 4.30±0.00 a |
|          | Cabernet Franc     | 22.71±0.22 b            | 4.57±0.10 e                          | 4.31±0.01 a |
|          | Cabernet Gernischt | 19.22±0.09 d            | 4.94±0.03 d                          | 4.24±0.01 b |
|          | Marselan           | 23.65±0.42 a            | 5.16±0.05 c                          | 4.14±0.01 c |
| 2020     | Chardonnay         | 18.93±0.51 d            | 5.74±0.30 b                          | 3.84±0.01 c |
|          | Sauvignon Blanc    | 18.87±0.32 d            | 6.30±0.09 a                          | 3.70±0.02 d |
|          | Cabernet Sauvignon | 21.07±0.60 b            | 4.02±0.04 d                          | 4.01±0.00 b |
|          | Cabernet Franc     | 22.53±0.29 a            | 5.61±0.34 b                          | 4.15±0.04 a |
|          | Cabernet Gernischt | 19.97±0.06 c            | 4.92±0.17 c                          | 4.20±0.03 a |
|          | Marselan           | 22.47±0.25 a            | 5.64±0.21 b                          | 3.97±0.03 b |

Table S3. Odour thresholds (OT), odour description, Odour activity values (OAVs) of green leaf volatiles (GLVs) in Chardonnay at different stages of the berry maturation in vintage 2019 and vintage 2020.

[illegible]

Table S4. Odour thresholds (OT), odour description, Odour activity values (OAVs) of green leaf volatiles (GLVs) in Sauvignon Blanc at different stages of the berry maturation in vintage 2019 and vintage 2020.

[illegible]

Table S5. Odour thresholds (OT), odour description, Odour activity values (OAVs) of green leaf volatiles (GLVs) in Cabernet Sauvignon at different stages of the berry maturation in vintage 2019 and vintage 2020.

[illegible]

Table S6. Odour thresholds (OT), odour description, Odour activity values (OAVs) of green leaf volatiles (GLVs) in Cabernet Franc at different stages of the berry maturation in vintage 2019 and vintage 2020.

[illegible]

Table S7. Odour thresholds (OT), odour description, Odour activity values (OAVs) of green leaf volatiles (GLVs) in Cabernet Gernischt at different stages of the berry maturation in vintage 2019 and vintage 2020.

[illegible]

Table S8. Odour thresholds (OT), odour description, Odour activity values (OAVs) of green leaf volatiles (GLVs) in Maselan at different stages of the berry maturation in vintage 2019 and vintage 2020.

[illegible]



Table S9. Quantitative ion, quantitative standards and calibration curves for quantification of volatile compounds

| NO | Compound                 | CAS      | RI <sup>1</sup> | Quantitative standards | Calibration curves  | R <sup>2</sup> |
|----|--------------------------|----------|-----------------|------------------------|---------------------|----------------|
| 1  | 2-ethyl-1-hexanol        | 104767   | 1488            | 2-ethyl-1-hexanol      | y = 372.02x-0.30    | 0.976          |
| 2  | 1-nonanol                | 143088   | 1622.3          | 1-nonanol              | y = 666.13x+0.23    | 0.969          |
| 3  | nonanal                  | 124196   | 1394.8          | nonanal                | y = 760.00x-0.42    | 0.973          |
| 4  | (E, E)-2,4-hexadienal    | 142836   | 1408.3          | (E)-2-hexenal          | y = 8238.82x+11.36  | 0.996          |
| 5  | (E)-2-nonenal            | 18829566 | 1542.1          | (E)-2-nonenal          | y = 4338.17x+1.33   | 0.977          |
| 6  | hexanal                  | 66251    | 1098.8          | hexanal                | y = 3922.72x-208.67 | 0.999          |
| 7  | 3-hexanal                | 4440657  | 1178.5          | (E)-2-hexenal          | y = 8238.82x+11.36  | 0.996          |
| 8  | (E)-2-hexenal            | 6728263  | 1204            | (E)-2-hexenal          | y = 5828.38x-380.83 | 0.993          |
| 9  | (Z)-3-hexen-1-ol acetate | 3681718  | 1307.7          | ethyl hexanoate        | y = 1991.68x-0.14   | 0.984          |
| 10 | 1-hexanol                | 111273   | 1347.1          | 1-hexanol              | y = 1636.43x+0.00   | 0.999          |
| 11 | (Z)-3-hexen-1-ol         | 928961   | 1381            | (Z)-3-hexenol          | y = 7898.50x+35.81  | 0.99           |
| 12 | (E)-2-hexen-1-ol         | 928950   | 1403.4          | (E)-2-hexenol          | y = 2685.83x+0.00   | 0.999          |
| 13 | (E, E)-2,6-nonadienal    | 17587336 | 1594.6          | (E)-2-nonenal          | y = 1766.26x+2.11   | 0.983          |

Notes:

a. Retention indices were calculated on HP-INNOWAX column.

b. The concentration of these compounds expressed as relative areas (to 4-methyl-2-pentanol).

Table S10. Primer used in real-time PCR

| Gene    | Sense                              | Antisense                   |
|---------|------------------------------------|-----------------------------|
| VvActin | GCATCCCTCAGCACCTTCCAGCAG           | CCACCTCAACACATCTCCATGTCAACC |
| VvLOX1  | GCAAATCAAAGGGACAACGCTGTATG         | TGCTTCCACTGCGGCTTCC         |
| VvHPL   | AAGTACACCGGCGACATTCGAG             | AGCTCTTTACCCTGGCGTGTTG      |
| VvADH1  | TCCGTTCTCAGAGATCAACAA              | ACTCTCTCATCTCAAGATATTCTATGG |
| VvADH2  | ATTCCAGTCGGCATAAGTGT               | TTGCAACTGCATAGACATTGTT      |
| VvAAT   | TTAATTCAAGGTGA <sub>c</sub> CCGATT | TCTCCATACACATGCCATTAG       |

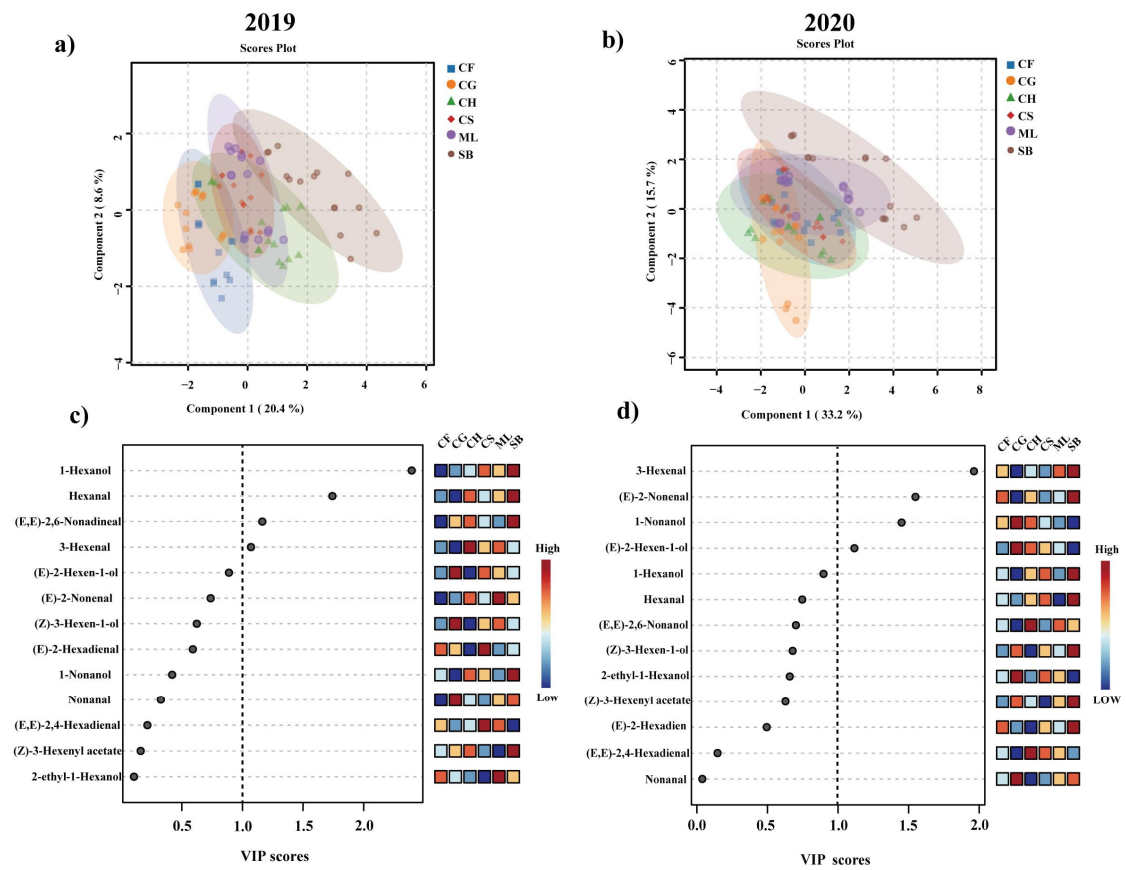

Fig. S1. Partial Least Squares Discriminant Analysis biplot illustrating the pattern of green leaf volatiles (GLVs) at different stages of the berry maturation in vintage 2019 (a) and vintage 2020 (b). VIP diagrams illustrate key differential compounds in vintage 2019 (c) and vintage 2020 (d). Legend: ▲ -Chardonnay, ● -Sauvignon Blanc, ◆ -Cabernet Sauvignon, ■ -Cabernet Franc, ▲ -Cabernet Gernischt, ● -Marselan.
